# Supplementary material
Source: publisher figshare collection journal article supplement (https://tandf.figshare.com/ndownloader/files/21655677)
Supplement: Supplementary file 1 [file 21655677]

# Supplementary Materials

*Sample Characteristics:*

**Table S1.**Main effect of Group on **IQ**. The model was defined as: IQ = β0 + β1Group + ε. Note, for the variable Group, controls are coded as 0.

| **Factor** | **ß** | **SE** | **T** | **P** |
| --- | --- | --- | --- | --- |
| Intercept | 102.81 | 2.28 | 45.01 | <0.001 |
| Group | -11.67 | 3.24 | -3.60 | <0.001 |

AIC weightmodel 1 = 0.43. AIC weightmodel 2 = 0.41. AIC weightmodel 3 = 0.16

**Table S2.** Main effect of Group and Nationality on **Age**. The model was defined as: Age = β0 + β1Group + β2Nationality + ε. Note, for the variables Group and Nationality, controls and Chinese are coded as 0, respectively.

| **Factor** | **ß** | **SE** | **T** | **P** |
| --- | --- | --- | --- | --- |
| Intercept | 29.76 | 1.00 | 29.64 | <0.001 |
| Group | -0.70 | 1.21 | -0.57 | 0.57 |
| Nationality | -4.65 | 1.22 | -3.81 | <0.001 |

AIC weightmodel 2 = 0.60. AIC weightmodel 3 = 0.39. AIC weightmodel 1= 0.001

**Table S3*.*** Average social functioning as measured with **PSP**. The model was defined as: PSP = β0 + ε.

| **Factor** | **ß** | **SE** | **T** | **P** |
| --- | --- | --- | --- | --- |
| Intercept | 54.70 | 1.57 | 34.9 | <0.001 |

AIC weightmodel 1 = 0.67. AIC weightmodel 2 = 0.33

**Table S4***.* Average social functioning as measured with **GAF-F**. The model was defined as: GAF-F = β0 + ε.

| **Factor** | **ß** | **SE** | **T** | **P** |
| --- | --- | --- | --- | --- |
| Intercept | 55.44 | 1.49 | 37.2 | <0.001 |

AIC weightmodel 1 = 0.63 (intercept only). AIC weightmodel 2 = 0.37

**Table S5***.*Average negative symptom severity as measured with **SANS**. The model was defined as: SANS = β0 + ε.

| **Factor** | **ß** | **SE** | **T** | **P** |
| --- | --- | --- | --- | --- |
| Intercept | 8.27 | 0.41 | 19.98 | <0.001 |

AIC weightmodel 1 = 0.72. AIC weightmodel 2 = 0.28

**Table S6.** Main effect of Nationality on psychotic symptoms as measured with **SAPS**. The model was defined as: SAPS = β0 + β1Nationality + ε. Note, for the variable Nationality, Chinese are coded as 0.

| **Factor** | **ß** | **SE** | **T** | **P** |
| --- | --- | --- | --- | --- |
| Intercept | 5.11 | 0.63 | 8.15 | <0.001 |
| Nationality | 1.85 | 0.92 | 2.04 | 0.047 |

AIC weightmodel 2 = 0.74. AIC weightmodel 1 = 0.26

## Cognition as measured with BACS:

**Table S7.** Main effect of Group and Nationality on **Verbal Memory**. The model was defined as: Verbal Memory = β0 + β1Group + β2Nationality + ε. Note, for the variables Group and Nationality, controls and Chinese are coded as 0, respectively.

| **Factor** | **ß** | **SE** | **T** | **P** |
| --- | --- | --- | --- | --- |
| Intercept | 45.86 | 1.33 | 34.44 | <0.001 |
| Group | -7.65 | 1.61 | -4.75 | <0.001 |
| Nationality | 7.39 | 1.62 | 4.57 | <0.001 |

AIC weightmodel 2 = 0.58. AIC weightmodel 3 = 0.42. AIC weightmodel 1 <0.001

**Table S8.** Main effect of Group on **Working Memory**. The model was defined as: Working Memory = β0 + β1Group + ε. Note, for the variable Group, controls are coded as 0.

| **Factor** | **ß** | **SE** | **T** | **P** |
| --- | --- | --- | --- | --- |
| Intercept | 21.90 | 0.49 | 44.29 | <0.001 |
| Group | -2.26 | 0.70 | -3.22 | 0.002 |

AIC weightmodel 1 = 0.52. AIC weightmodel 3 = 0.28. AIC weightmodel 2 = 0.20

**Table S9.** Main effect of Group and Nationality on **Motor Speed**. The model was defined as: Motor Speed = β0 + β1Group + β2Nationality + ε. Note, for the variables Group and Nationality, controls and Chinese are coded as 0, respectively.

| **Factor** | **ß** | **SE** | **T** | **P** |
| --- | --- | --- | --- | --- |
| Intercept | 75.36 | 2.32 | 32.45 | <0.001 |
| Group | -5.72 | 2.81 | -1.99 | 0.049 |
| Nationality | -10.96 | 2.82 | -3.89 | <0.001 |

AIC weightmodel 2 = 0.70. AIC weightmodel 3 = 0.30 AIC weightmodel 1= 0.001

**Table S10.** Main effect of Group and Nationality on **Verbal Fluency**. The model was defined as: Verbal Fluency = β0 + β1Group + β2Nationality + ε. Note, for the variables Group and Nationality, controls and Chinese are coded as 0, respectively.

| **Factor** | **ß** | **SE** | **T** | **P** |
| --- | --- | --- | --- | --- |
| Intercept | 40.45 | 1.73 | 23.37 | <0.001 |
| Group | -11.17 | 2.09 | -5.34 | <0.001 |
| Nationality | 18.95 | 2.10 | 9.02 | 0.001 |

AIC weightmodel 2 = 0.66. AIC weightmodel 3 = 0.34. AIC weightmodel 1< 0.001

**Table S11***.*Interaction between Group and Nationality on **Speed of Processing**. The model was defined as: Speed of Processing = β0 + β1Group + β2Nationality + β3GroupNationality + ε. Note, for the variables Group and Nationality, controls and Chinese are coded as 0, respectively.

| **Factor** | **ß** | **SE** | **T** | **P** |
| --- | --- | --- | --- | --- |
| Intercept | 61.53 | 1.78 | 34.58 | <0.001 |
| Group | -16.41 | 2.57 | -6.39 | <0.001 |
| Nationality | 2.82 | 2.70 | 1.04 | 0.30 |
| Group × Nationality | 7.42 | 3.83 | 1.94 | 0.05 |

AIC weightmodel 3 = 0.71. AIC weightmodel 2 = 0.29. AIC weightmodel 1 < 0.003

**Table S12***.*Interaction between Group and Nationality on **Executive Functions**. The model was defined as: Executive Functions = β0 + β1Group + β2Nationality + β3GroupNationality + ε. Note, for the variables Group and Nationality, controls and Chinese are coded as 0, respectively.

| **Factor** | **ß** | **SE** | **T** | **P** |
| --- | --- | --- | --- | --- |
| Intercept | 16.84 | 0.60 | 28.06 | <0.001 |
| Group | -2.44 | 0.87 | -2.82 | 0.007 |
| Nationality | 1.33 | 0.91 | 1.46 | 0.15 |
| Group × Nationality | 2.91 | 1.29 | 2.26 | 0.03 |

AIC weightmodel 3 = 0.83. AIC weightmodel 2 = 0.17. AIC weightmodel 1< 0.001
